# Supplementary material for: Portable general microfluidic device with complex electric field regulation functions for electrokinetic experiments
Source: Royal Society of Chemistry journal article supplement (doi:10.1039/d2lc01053d), 2022-12-02
Supplement: d2lc01053d4.pdf [file d2lc01053d4.pdf]

## **Portable general microfluidic device with complex electric field regulation functions for electrokinetic experiments**

Wenshang Guo,<sup>a</sup> Ye Tao,<sup>a</sup> Kaihao Mao,<sup>a</sup> Weiyu Liu,<sup>b</sup> Rui Xue,<sup>a</sup> Zhenyou Ge,<sup>a</sup> and Yukun Ren<sup>\*a</sup>

<sup>a</sup> *State Key Laboratory of Robotics and System, Harbin Institute of Technology, West Da-zhi Street 92, Harbin, Heilongjiang 150001, People's Republic of China.*

<sup>b</sup> *School of Electronics and Control Engineering, Chang'an University, Middle-Section of Nan'er Huan Road, Xi'an 710000, China.*

\* *Corresponding author.*

*E-mail addresses: rykhit@hit.edu.cn (Yukun Ren)*

## Supplementary Information

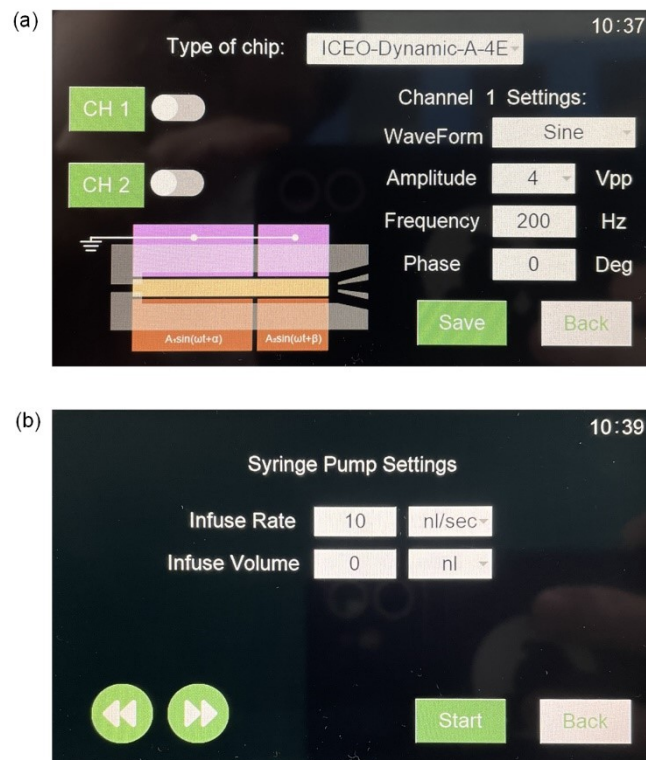

**Fig. S1.** The GUI on the display. (a) Electric field signal setting interface; (b) Micropump setting interface.

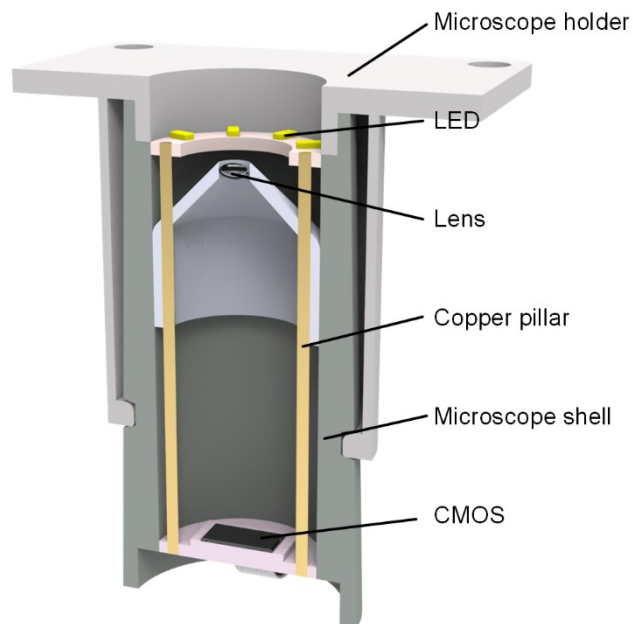

**Fig. S2.** Sectional view of microscope.

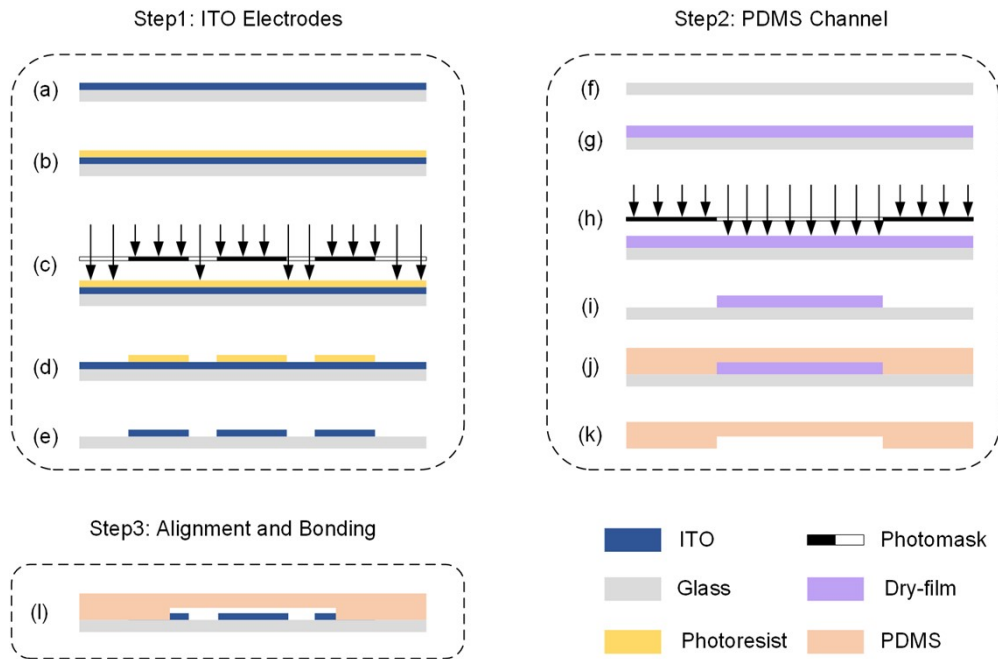

**Fig. S3.** The fabrication process of the microfluidic chip. (a) The ITO-coated glass slide cleaned; (b) The negative dry film laminated; (c) Ultraviolet light exposure; (d) Development; (e) ITO etching; (f) Glass cleaned; (g) Dry film stuck; (h) Ultraviolet light exposure; (i) Development; (j) Microchannel reproduced with PDMS; (k) PDMS channel stripped off; (l) Alignment and bonding.

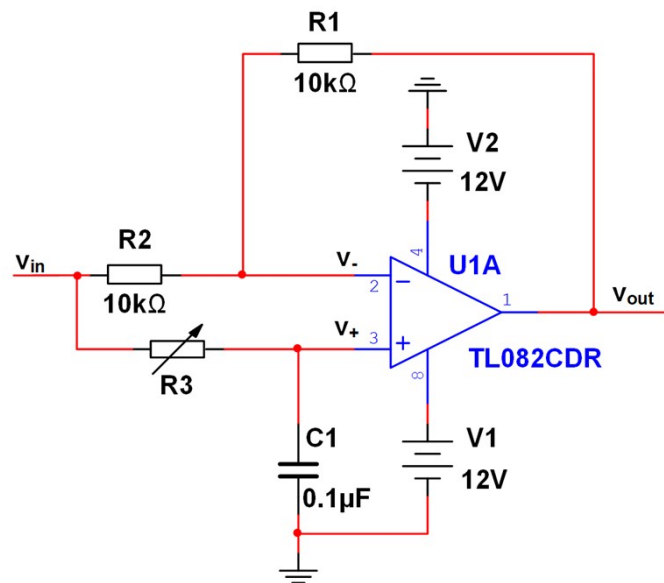

**Fig. S4.** Circuit diagram of phase lag regulator.

Note: Due to the characteristics of operational amplifier, if  $v_{in} = \sin(\omega t)$ , due to the virtual break of the op-amp, it can be deduced from the circuit:

$$v_+ = \frac{1}{R_3 + \frac{1}{j\omega C_1}} v_{in} = \frac{1}{1 + j\omega C_1 R_3} v_{in} \quad (S1)$$

$$v_- = v_{in} + \frac{(v_{out} - v_{in}) \cdot R_1}{R_1 + R_2} = \frac{R_2 v_{in} + R_1 v_{out}}{R_1 + R_2} \quad (S2)$$

Where  $\omega$  is the angular frequency,  $v_{in}$  is the input signal and  $v_{out}$  is the output signal. When  $R_1 = R_2$ , due to the virtual short of the op-amp, the magnification of the op amp is:

$$\frac{v_{out}}{v_{in}} = \frac{1 - j\omega C_1 R_3}{1 + j\omega C_1 R_3} \quad (S3)$$

It can be seen from equation (S3) that the output signal amplitude is not attenuated, and the phase lag is  $2 \arctan(2\pi f C_1 R_3)$ .

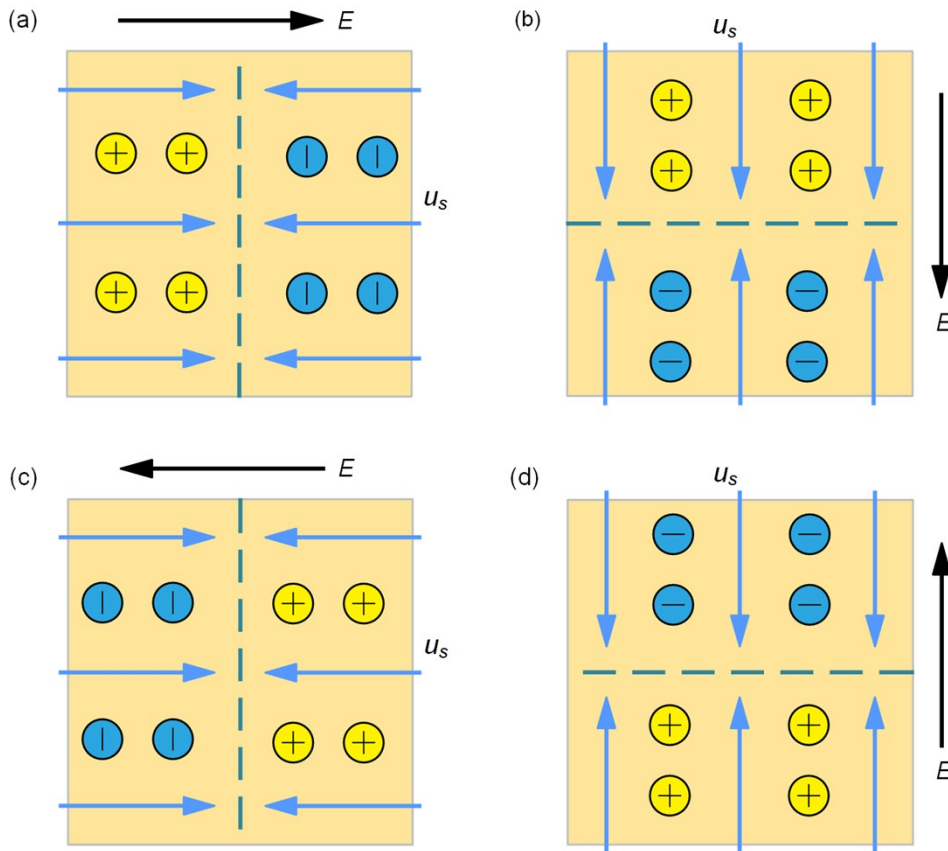

**Fig. S5.** Transient ionic charge polarity and slip flow direction at different time instants. (a)  $t=0$ ; (b)  $t=T/4$ ; (c)  $t=T/2$ ; (d)  $t=3T/4$ .

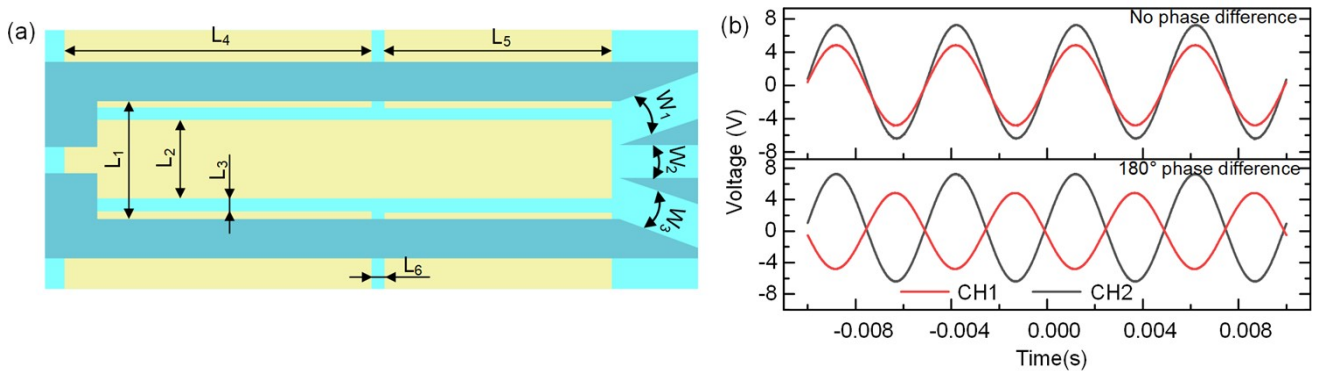

**Fig. S6.** (a) Structure size in particle beam switching experiment; (b) AC signals applied in particle beam switching experiment.

Note: When the applied AC signal has no phase difference, the particle beam flows out of the middle outlet. When the phase difference is  $180^\circ$ , the particle beam can be deflected to one side, and the deflection direction depends on the polarity of the applied signal.

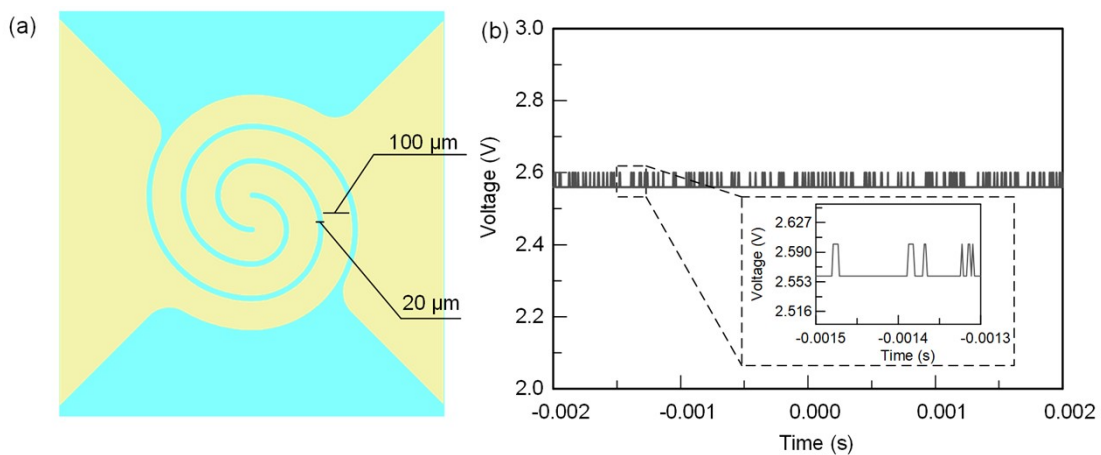

**Fig. S7.** (a) Structure size in thermal buoyancy convection experiment; (b) DC signal applied in thermal buoyancy convection experiment.

Note: The applied DC signal has a certain fluctuation, but the fluctuation range is less than  $0.1\text{V}$ , which is normal. Although capacitors are used for filtering and decoupling in the circuit, there will still be some fluctuations due to device errors and environmental interference.

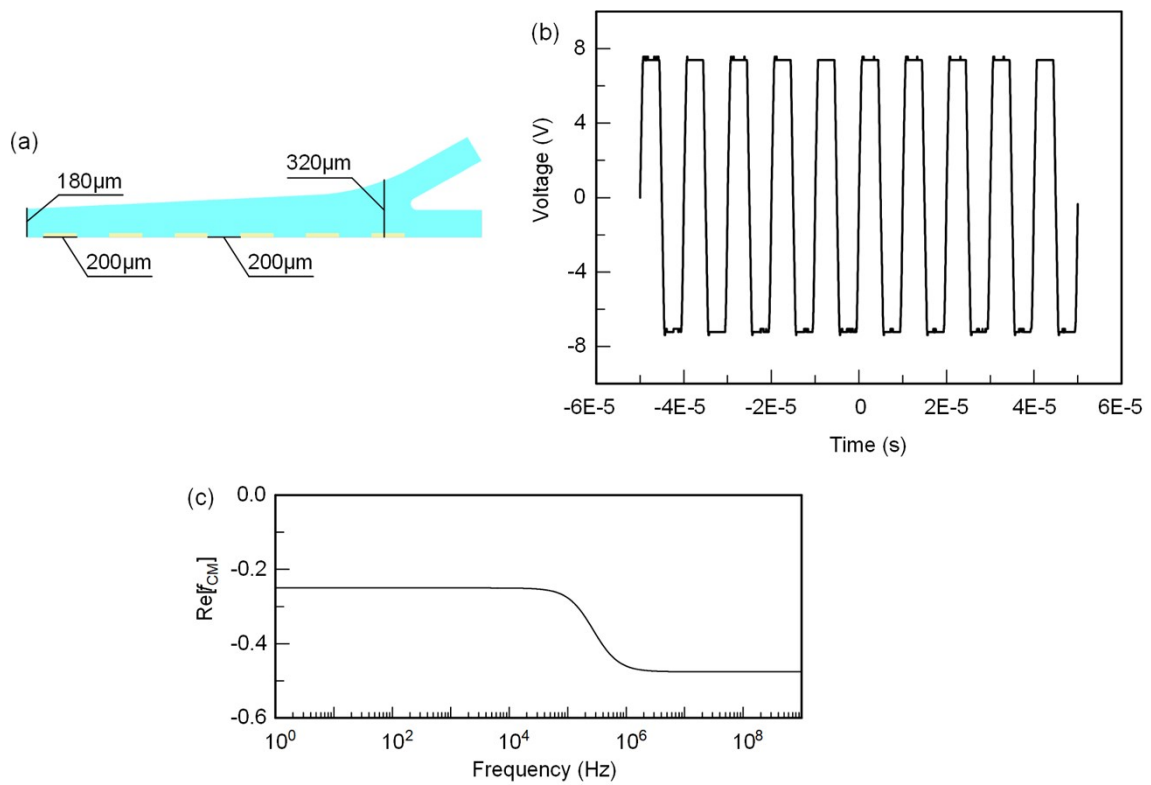

**Fig. S8.** (a) Structure size in DEP experiment; (b) AC signal applied in DEP experiment; (c) Frequency dependence of the real part of the CM factors in the buffer solutions.

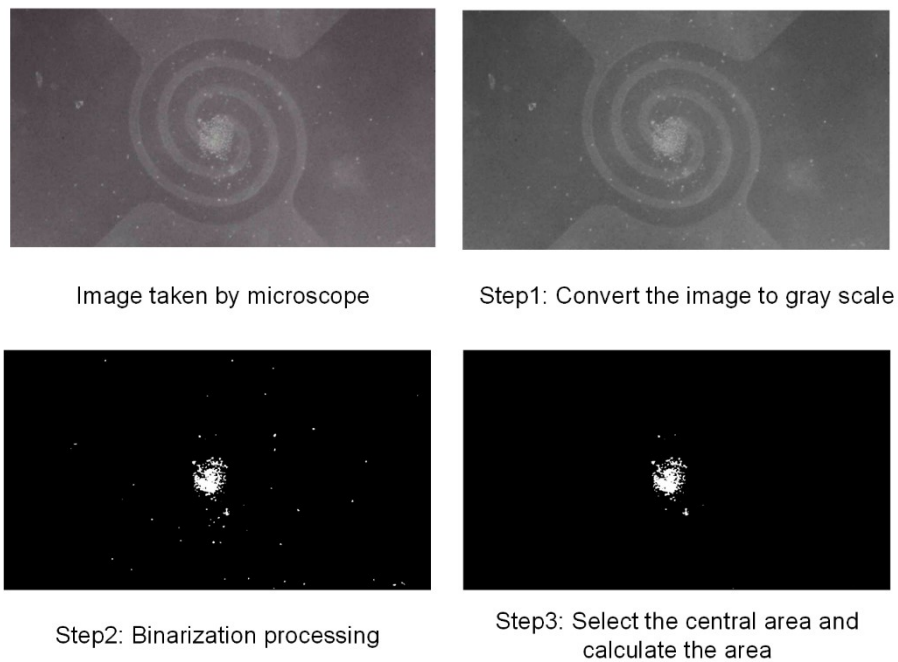

**Fig. S9.** Image processing steps for calculating focusing area

**Table S1.** Output specifications of PGMD

| Parameters               | Value                                 |             |
|--------------------------|---------------------------------------|-------------|
| Microscope magnification | 20-50x                                |             |
| AC signal                | Number of channels                    | 4           |
|                          | amplitude                             | 2-14 Vpp    |
|                          | frequency                             | 0.1-400K Hz |
|                          | Phase difference of adjacent channels | 0-90°       |
| DC signal                | 1 channel with amplitude of 0.1-5 V   |             |
| Micropump flow rate      | 5.7-4560 nL/s                         |             |

**Table S2.** Boundary conditions applied in numerical simulation.

| Boundary                              | B.C. for electrical problem $\nabla^2 \tilde{\phi} = 0$                                                |
|---------------------------------------|--------------------------------------------------------------------------------------------------------|
| Electrode of 0° voltage               | $\tilde{\phi} = A$                                                                                     |
| Electrode of 90° voltage              | $\tilde{\phi} = jA$                                                                                    |
| Electrode of 180° voltage             | $\tilde{\phi} = -A$                                                                                    |
| Electrode of 270° voltage             | $\tilde{\phi} = -jA$                                                                                   |
| Floating electrode                    | $\sigma n \cdot \nabla \tilde{\phi} = j\omega C_0 (\tilde{\phi} - \tilde{\phi}_0), \tilde{\phi}_0 = 0$ |
| Insulating wall/electrolyte interface | $n \cdot \nabla \tilde{\phi} = 0$                                                                      |

Where  $\tilde{\phi} = Ae^{j\theta}$  is complex phasor amplitude of electrostatic potential;  $n$  denotes the unit normal vector pointing into electrolyte;  $C_0$  is the total interface capacitance of induced double layer.

**Table S3.** Structure size of particle beam switching chip based on ICEO.

| Symbol     | Value ( $\mu\text{m}$ ) |
|------------|-------------------------|
| $L_1$      | 520                     |
| $L_2$      | 300                     |
| $L_3$      | 60                      |
| $L_4$      | 2000                    |
| $L_5$      | 1000                    |
| $L_6$      | 200                     |
| $W_1, W_3$ | 200                     |

---

$W_2$

100

---
